# Supplementary material for: The Association of Healthy Lifestyle and Socioeconomic Status with Kidney Stone Occurrence: A Cross-Sectional Study
Source: Research Square preprint supplement (doi:10.21203/rs.3.rs-7028338/v1), 2025-09-17
Supplement: Supplementary file 1 [file 92581ce75610a14264ba222c.docx]

Table 2 Associations of lifestyle score with kidney stone.

|  | **Model 5** | | **Model 6** | | **Model 7** | |
| --- | --- | --- | --- | --- | --- | --- |
|  | β (95% CI) | P-Value | β(95% CI) | P-Value | β (95% CI) | P-Value |
| lifestyle score |  |  |  |  |  |  |
| Very Poor | reference | reference | reference | reference | reference | reference |
| Poor | -0.30 (-0.61, -0.01) | 0.054 | -0.36(-0.68, -0.06) | 0.023 | -0.28(-0.60, 0.02) | 0.077 |
| Fair | -0.18 (-0.49, 0.11) | 0.200 | -0.40(-0.71, - 0.11) | 0.010 | -0.33(-0.65, -0.04) | 0.034 |
| Good | 0.00 (-0.32, 0.31) | ＞0.900 | -0.21(-0.54, 0.10) | 0.200 | -0.17(-0.51, 0.14) | 0.300 |
| Excellent | -0.38(-0.86,0.11) | 0.120 | -0.56(-1.00, -0.06) | 0.025 | -0.54(-1.00, -0.04) | 0.029 |

Abbreviations: CI: Confidence interval.

Model 5: Unadjusted for covariates.

Model 6: Adjusted for sex, age, race, marital status.

Model 7: Adjusted for sex, age, race, marital status, BMI, diabetes, and hypertension.
